# Supplementary material for: Microbially facilitated nitrogen cycling in tropical corals
Source: ISME J. 2021 Jul 5;16(1):68–77. doi: 10.1038/s41396-021-01038-1 (PMC8692614; doi:10.1038/s41396-021-01038-1)
Supplement: Supplementary file 2 — Supplementary Table [file 41396_2021_1038_MOESM2_ESM.pdf]

| Order             |                                      | Closest species |   | Frequency of marker gene hits |   |      |   |      |   |      |   |      |   |      |   |      |   |  |  |
|-------------------|--------------------------------------|-----------------|---|-------------------------------|---|------|---|------|---|------|---|------|---|------|---|------|---|--|--|
|                   |                                      |                 |   | nifH                          |   | nrfA |   | napA |   | narG |   | nirK |   | nirS |   | nosZ |   |  |  |
|                   |                                      |                 |   | A                             | B | A    | B | A    | B | A    | B | A    | B | A    | B | A    | B |  |  |
| Rhizobiales       | <i>Mesorhizobium huakuii</i>         | 1               |   |                               |   |      |   |      |   |      |   |      |   |      |   |      |   |  |  |
| Rhizobiales       | <i>Martelella endophytica</i>        | 1               |   |                               |   |      |   |      |   |      |   |      |   |      |   |      |   |  |  |
| Rhizobiales       | <i>Bradyrhizobium japonicum</i>      | 1               | 1 |                               |   |      |   |      |   |      |   |      |   |      |   |      |   |  |  |
| Rhizobiales       | <i>Sinorhizobium meliloti</i>        | 1               |   |                               |   |      |   |      |   |      |   |      |   |      |   |      |   |  |  |
| Rhizobiales       | <i>Rhodopseudomonas palustris</i>    | 1               | 1 |                               |   |      |   |      |   |      |   |      |   |      |   |      |   |  |  |
| Rhizobiales       | <i>Hoeflea phototrophica</i>         | 17              | 6 |                               |   |      |   |      |   |      |   |      |   |      |   |      |   |  |  |
| Rhizobiales       | <i>Blastochloris viridis</i>         | 3               |   |                               |   |      |   |      |   |      |   |      |   |      |   |      |   |  |  |
| Rhizobiales       | <i>Fulvimarina pelagi</i>            | 2               | 5 |                               |   |      |   |      |   |      |   |      |   |      |   |      |   |  |  |
| Rhizobiales       | <i>Methylobacterium aquaticum</i>    |                 | 1 |                               |   |      |   |      |   |      |   |      |   |      |   |      |   |  |  |
| Rhizobiales       | <i>M. rhodesianum</i>                |                 | 3 |                               |   |      |   |      |   |      |   |      |   |      |   |      |   |  |  |
| Rhizobiales       | <i>Methylocella silvestris</i>       |                 | 2 |                               |   |      |   |      |   |      |   |      |   |      |   |      |   |  |  |
| Rhodobacterales   | <i>Rhodovulum sulfidophilum</i>      | 2               |   |                               |   |      |   |      |   |      |   |      |   |      |   |      |   |  |  |
| Rhodobacterales   | <i>Roseibacterium elongatum</i>      | 4               | 2 |                               |   |      |   |      |   |      |   |      |   |      |   |      |   |  |  |
| Rhodobacterales   | <i>Hyphomonadaceae bacterium</i>     | 3               |   |                               |   |      |   |      |   |      |   |      |   |      |   |      |   |  |  |
| Rhodobacterales   | <i>Dinoroseobacter shibae</i>        | 1               |   |                               |   |      |   |      |   |      |   |      |   |      |   |      |   |  |  |
| Rhodobacterales   | <i>Tateyamaria omphalii</i>          |                 | 4 |                               |   |      |   |      |   |      |   |      |   |      |   |      |   |  |  |
| Rhodobacterales   | <i>Loktanella vestfoldensis</i>      |                 | 3 |                               |   |      |   |      |   |      |   |      |   |      |   |      |   |  |  |
| Rhodobacterales   | <i>Rhodobacter capsulatus</i>        |                 | 1 |                               |   |      |   |      |   |      |   |      |   |      |   |      |   |  |  |
| Rhodobacterales   | <i>Planktomarina temperata</i>       |                 | 5 |                               |   |      |   |      |   |      |   |      |   |      |   |      |   |  |  |
| Rhodospirillales  | <i>Asaia bogorensis</i>              | 1               |   |                               |   |      |   |      |   |      |   |      |   |      |   |      |   |  |  |
| Caulobacterales   | <i>Brevundimonas subvibrioides</i>   | 1               | 1 |                               |   |      |   |      |   |      |   |      |   |      |   |      |   |  |  |
| Sphingomonadales  | <i>Sphingomonas hengshuiensis</i>    | 2               | 1 |                               |   |      |   |      |   |      |   |      |   |      |   |      |   |  |  |
| Sphingomonadales  | <i>Porphyrobacter neustonensis</i>   | 2               |   |                               |   |      |   |      |   |      |   |      |   |      |   |      |   |  |  |
| Hyphomonadales    | <i>Hyphomonadaceae sp.</i>           |                 | 2 |                               |   |      |   |      |   |      |   |      |   |      |   |      |   |  |  |
| Rhodocyclales     | <i>Dechloromonas aromatica</i>       | 1               | 1 |                               |   |      |   |      |   |      |   |      |   |      |   |      |   |  |  |
| Rhodocyclales     | <i>Methyloversatilis universalis</i> | 2               |   |                               |   |      |   |      |   |      |   |      |   |      |   |      |   |  |  |
| Burkholderiales   | <i>Rhodoferax antarcticus</i>        | 7               | 2 |                               |   |      |   |      |   |      |   |      |   |      |   |      |   |  |  |
| Alteromonadales   | <i>Alteromonadaceae bacterium</i>    | 1               |   |                               |   |      |   |      |   |      |   |      |   |      |   |      |   |  |  |
| Thiotrichales     | <i>Beggiatoa leptomitiformis</i>     | 1               |   |                               |   |      |   |      |   |      |   |      |   |      |   |      |   |  |  |
| Cellvibrionales   | <i>Congregibacter litoralis</i>      | 3               | 1 |                               |   |      |   |      |   |      |   |      |   |      |   |      |   |  |  |
| Chromatiales      | <i>Thiodictyon syntrophicum</i>      | 1               |   |                               |   |      |   |      |   |      |   |      |   |      |   |      |   |  |  |
| Chromatiales      | <i>Thioflavicoccus mobilis</i>       | 1               |   |                               |   |      |   |      |   |      |   |      |   |      |   |      |   |  |  |
| Chromatiales      | <i>Marichromatium purpuratum</i>     |                 | 4 |                               |   |      |   |      |   |      |   |      |   |      |   |      |   |  |  |
| Synechococcales   | <i>Cyanobium gracile</i>             |                 | 1 |                               |   |      |   |      |   |      |   |      |   |      |   |      |   |  |  |
| Gemmatimonales    | <i>Gemmatimonas phototrophica</i>    | 3               |   |                               |   |      |   |      |   |      |   |      |   |      |   |      |   |  |  |
| Spirochaetales    | <i>Spirochaeta thermophil</i>        |                 | 1 |                               |   |      |   |      |   |      |   |      |   |      |   |      |   |  |  |
| Vibrionales       | <i>Aliivibrio fischeri</i>           |                 |   | 8                             | 1 | 1    | 1 |      |   |      |   |      |   |      |   |      |   |  |  |
| Vibrionales       | <i>Aliivibrio salmonicida</i>        |                 |   | 2                             | 0 |      |   |      |   |      |   |      |   |      |   |      |   |  |  |
| Vibrionales       | <i>Vibrio parahaemolyticus</i>       |                 |   | 14                            | 2 | 8    | 4 |      |   |      |   |      |   |      |   |      |   |  |  |
| Vibrionales       | <i>Vibrio vulnificus</i>             |                 |   | 11                            | 2 | 0    | 1 |      |   |      |   |      |   |      |   |      |   |  |  |
| Aeromonadales     | <i>Aeromonas salmonicida</i>         |                 |   |                               |   | 1    | 0 |      |   |      |   |      |   |      |   |      |   |  |  |
| Campylobac.       | <i>Campylobacter lari</i>            |                 |   |                               |   | 1    | 0 |      |   |      |   |      |   |      |   |      |   |  |  |
| Alteromonadales   | <i>Colwellia psychrerythraea</i>     |                 |   |                               |   | 3    | 4 |      |   |      |   |      |   |      |   |      |   |  |  |
| Rhodobacterales   | <i>Dinoroseobacter shibae</i>        |                 |   |                               |   | 1    | 1 |      |   |      |   |      |   |      |   |      |   |  |  |
| Burkholderiales   | <i>Leptothrix cholodnii</i>          |                 |   |                               |   | 1    | 0 |      |   |      |   |      |   |      |   |      |   |  |  |
| Epsilonproteobac. | <i>Nitratiruptor sp.</i>             |                 |   |                               |   | 1    | 0 |      |   |      |   |      |   |      |   |      |   |  |  |
| Alteromonadales   | <i>Saccharophagus degradans</i>      |                 |   |                               |   | 1    | 0 |      |   |      |   |      |   |      |   |      |   |  |  |
